# Supplementary material for: Compartmentalization proteomics revealed endolysosomal protein network changes in a goat model of atrial fibrillation
Source: PubMed Central journal article supplement (PMC11141153; doi:10.1016/j.isci.2024.109609), 2024-03-28
Supplement: mmc1.pdf [file mmc1.pdf]

**Supplemental information**

**Compartmentalization proteomics revealed  
endolysosomal protein network changes  
in a goat model of atrial fibrillation**

**Thamali Ayagama, Philip D. Charles, Samuel J. Bose, Barry Boland, David A. Priestman, Daniel Aston, Georgina Berridge, Roman Fischer, Adam P. Cribbs, Qianqian Song, Gary R. Mirams, Kwabena Amponsah, Lisa Heather, Antony Galione, Neil Herring, Holger Kramer, Rebecca A. Capel, Frances M. Platt, Ulrich Schotten, Sander Verheule, and Rebecca A. B. Burton**

## Supplemental Figures and Tables

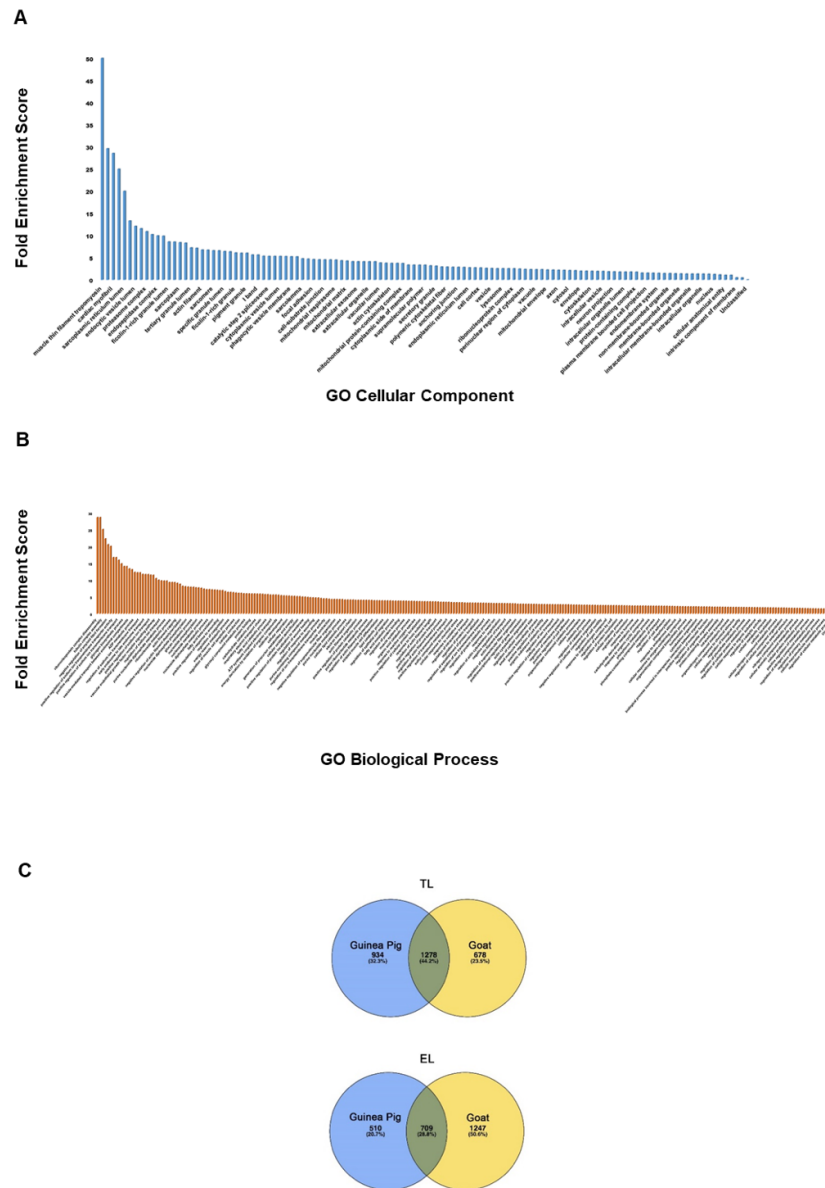

**Figure S1:** The enrichment of regulated proteins in AF goat model compared to the total human proteome **relating to Figure 1 and 3. A) and B)** The over representation test was performed using the converted *C. hircus* protein identifiers to *H. sapiens*. The higher fold enrichment scores were plotted against the Gene Ontology functional and anatomical parameters, Cellular component and Biological process. **C)** Species comparison between *C. porcellus* and *C. hircus* TL and EL fractions against the protein yield discovered from Ayagama *et al.* 2021 study<sup>21</sup> to understand the protein/gene recovery.

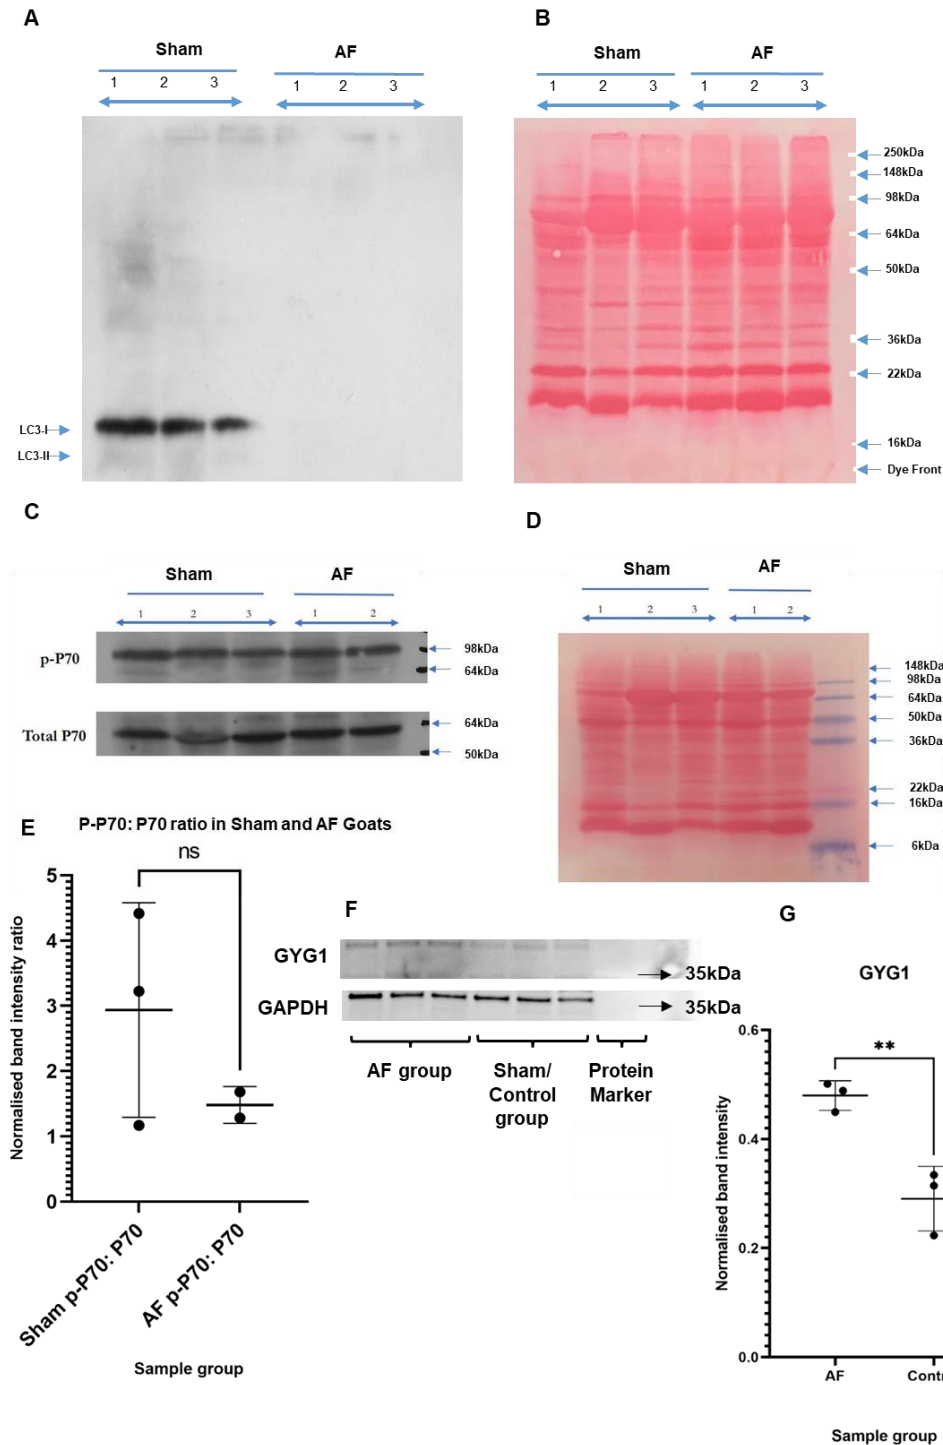

**Figure S2: Western blotting for protein identification and quantification relating to Figure 1, 2 and 3. A) and B) The absence of the LC3- I and LC3-II proteins showed an overactive autophagic flux in the LA tissue of the AF goat model, and a Ponceau blot of the LC3-I and LC3-**

II membrane was prepared to observe equal protein loading. **C), D) and E)** Western blotting of the mTOR-specific epitope p-P70 and total P70 levels. The p-P70 protein level change is insignificant compared to total P70. **F) and G)** Western Blotting of Glycogenin-1 and GAPDH. GYG1 western blots displayed a significant upregulation of GYG-1 protein in the LA tissue of the AF goat model ( $p = 0.007$ ).

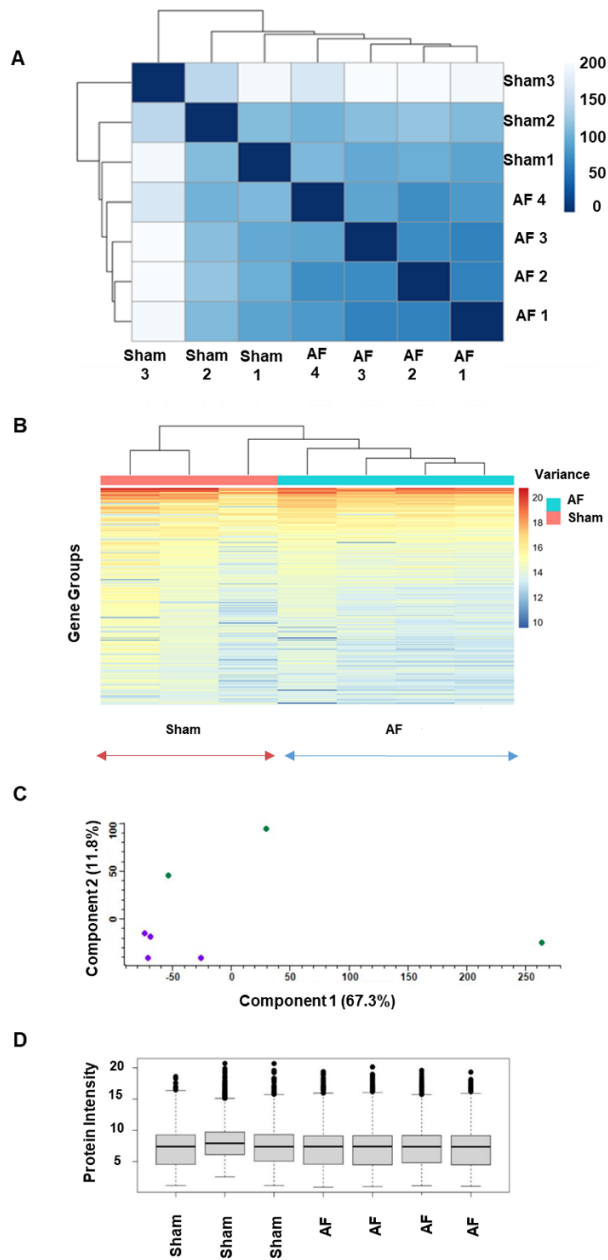

**Figure S3: Quality control analysis for transcriptomics relating to Figure 4A.** **A)** Distance matrix heatmap to determine the distance between the AF and sham samples according to their gene groups. **B)** A heat map of the transcripts obtained from all the samples after analysed for hierarchical clustering. **C)** PCA plot to verify the sample distribution between AF (purple circles) and sham (green circles) groups. Component 1 showed a deviation of 67.3% between the groups and component 2 showed a 11.8% of deviation between the samples of sham group biological replicates. **D)** Whisker plot showing the transcript distribution between the AF and sham biological replicates.

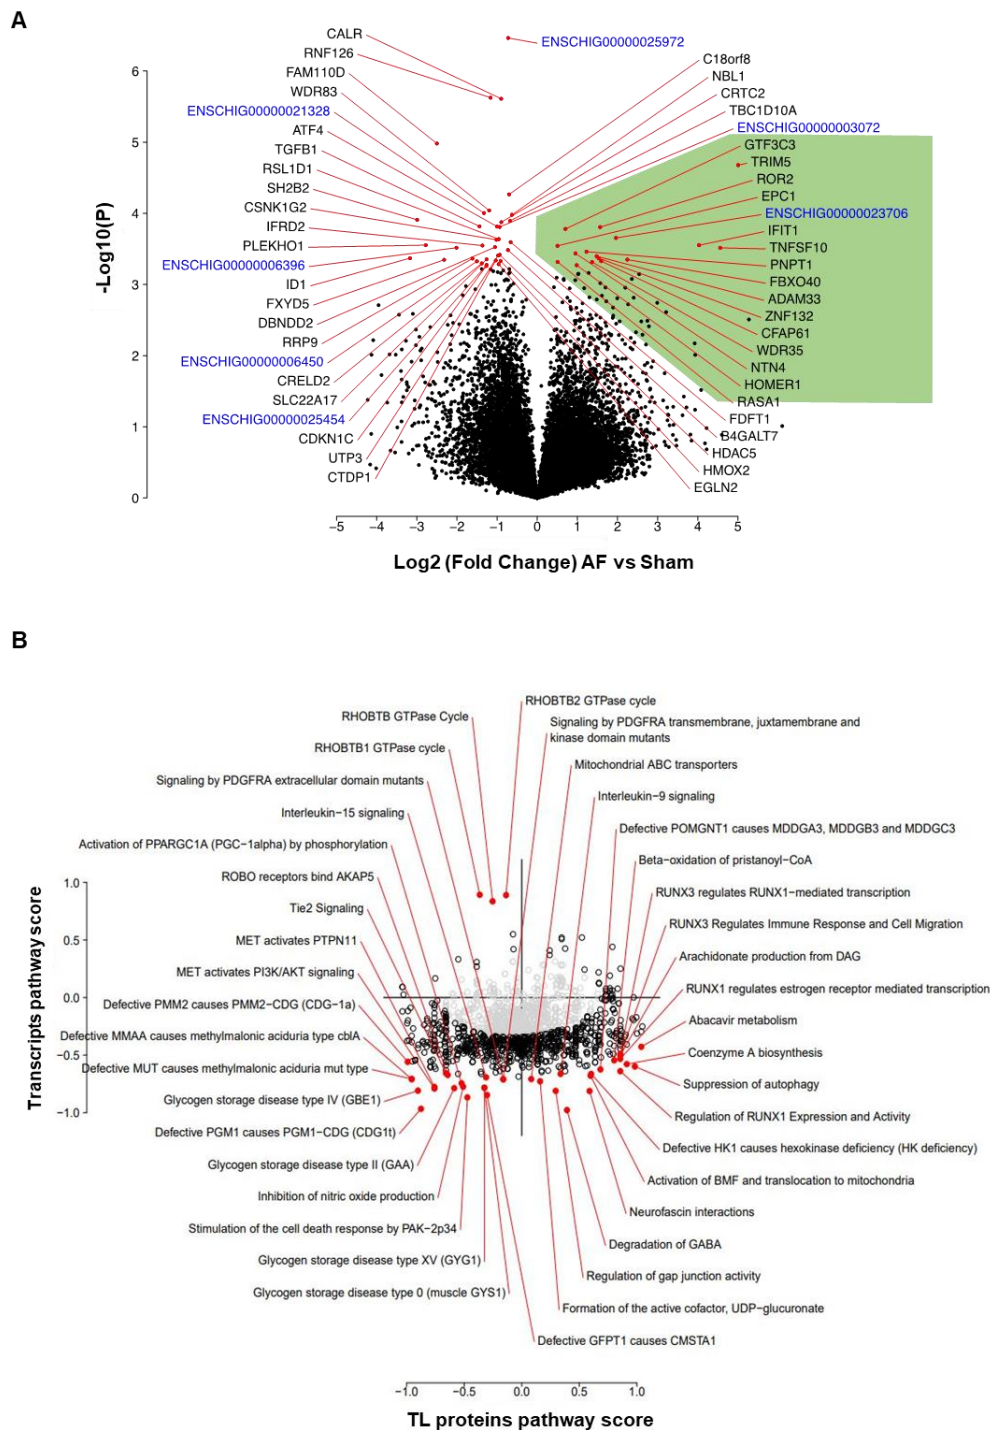

**Figure S4: Transcriptomics and integrated analysis (TL) relating to Figure 1(B). A) Volcano plot of the most significantly regulated genes identified from the transcriptomics analysis. B) Integrated Analysis; TL protein pathways vs mRNA transcript pathway scores. The pathways**

falling well under the horizontal line are up/downregulated more strongly in the proteomics than the transcriptomics vice versa for pathways falling above the line. grey = nonsignificant pathways, black= significant pathways red= highest-significant pathways (FDR=0.01) and the black horizontal line indicates  $y=x$ .

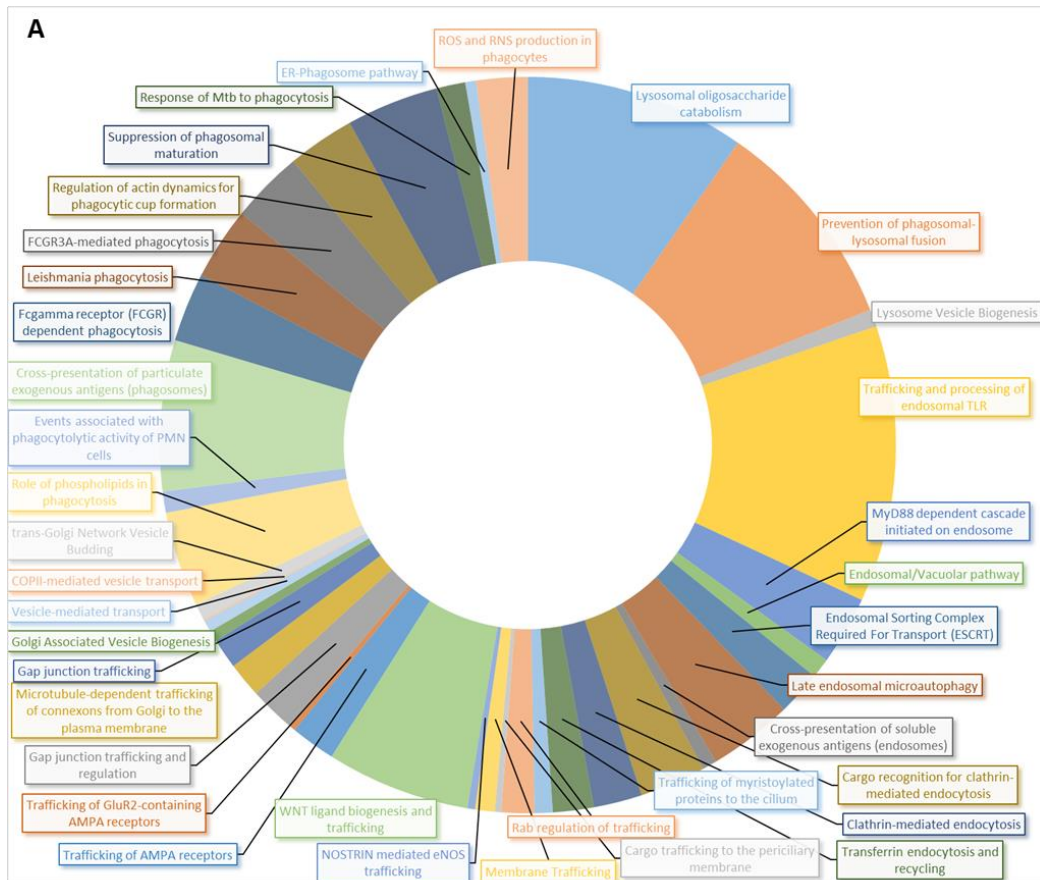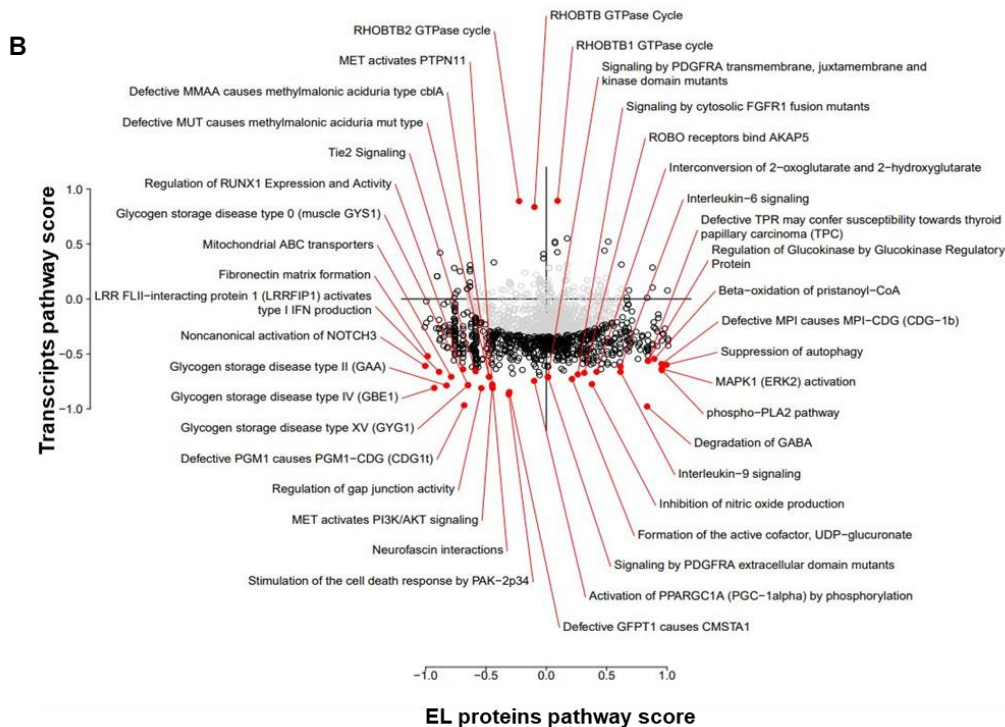



**Figure S5: Pathways representing the acidic organelles and integrated analysis (EL) relating to Figure 1(A).** **A)** Pathways representing the acidic organelles, vesicles and trafficking network from integrated analysis are represented using a donut chart against the enrichment scores. Data used to create this plot can be found in Supplementary Table S2.1. **B)** Integrated analysis of EL protein pathways vs mRNA transcript pathway scores. Pathways represented in black and red are significantly altered (based on null hypothesis of no change) in either the transcriptomic data, proteomic data, or both. Pathways in the lower left and upper right (i.e. close to  $y=x$ ) are regulated in the same direction in both modalities. Pathways in the upper left and lower right (i.e. close to  $y=-x$ ) are regulated in the opposite direction in the two modalities. Grey = nonsignificant pathways; Black = significantly altered pathways ( $FDR < 0.01$ ); Red = top 40 most significant pathways.

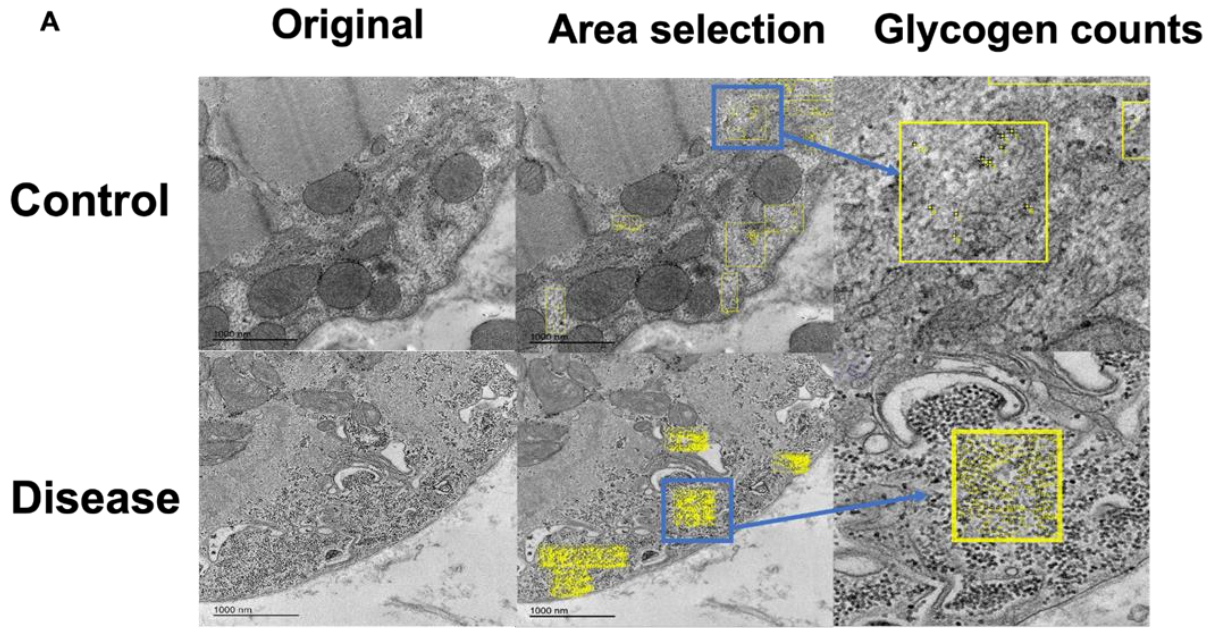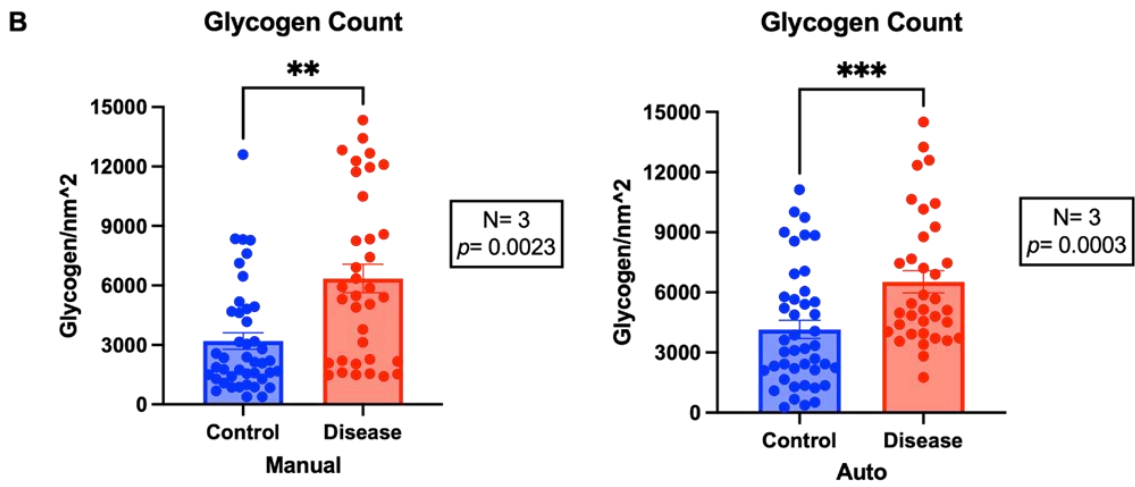

**Figure S6: Electron microscopy analysis of glycogen expression in control vs AF goat atrial tissue relating to Figure 5. A)** Demonstration of cardiac myocyte under EM. Cytosolic area was selected manually (blue box), then the glycogen (black spot, labelled yellow) was counted both manually and automatically (user independent). **B)** Both manual and automated glycogen quantification statistically reveal the same result, that glycogen count was significantly higher in the disease samples. Manual count, disease mean glycogen count  $6354 \pm 714.8/\text{nm}^2$  vs. control mean glycogen count  $3195 \pm 417.9/\text{nm}^2$ ,  $p = 0.0023$ ; Auto count disease mean glycogen count  $6529 \pm 555.0/\text{nm}^2$  vs. control mean glycogen count  $4154 \pm 415.8/\text{nm}^2$ ,  $p = 0.0003$ .  $N=3$  for each group.

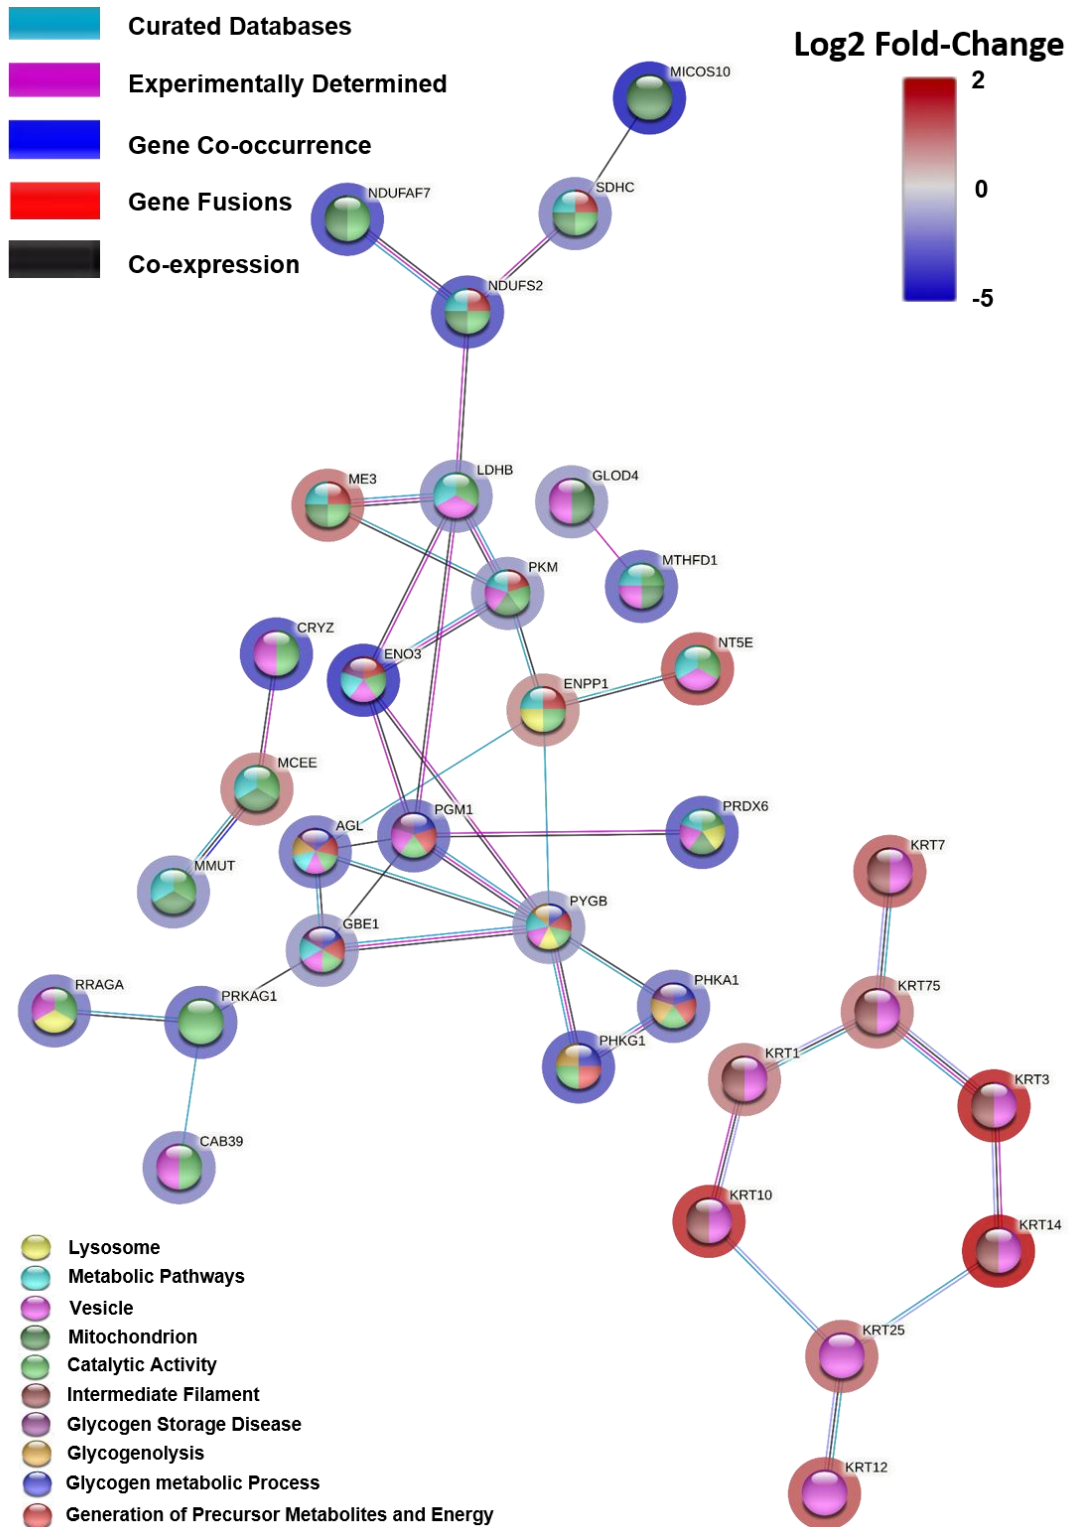

**Figure S7: Association network in STRING. Tissue lysate (TL) Network Cluster 5 relating to Figure 1B.** The most significant proteins that have a functional role of regulatory and catalytic activity are clustered together. Edges based on curated databases, experiments, gene co-

occurrences, gene fusions, co-expressions and the nodes are coloured according to their functional enrichments. The halo around the nodes displays the significant log<sub>2</sub> fold-change.

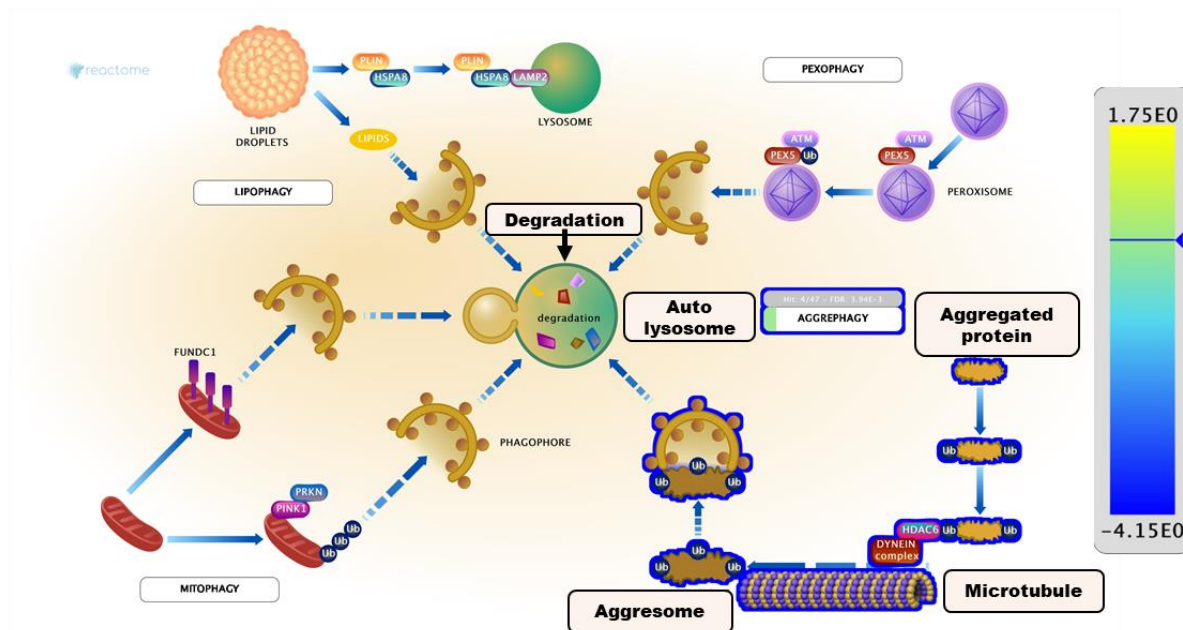

**Figure S8: Cartoon of Aggresome formation relating to Figure 1.** The majority of the misfolded protein degradation was detected by then over expressed ubiquitin levels in the left atrial cells of the AF goat model. (Colour code= yellow to blue gradient; yellow represent highest up regulation while blue represent highest down regulation. Grey box above the aggrephagy label indicates the pathway entities detected in the query dataset, the total number of entities in the pathway, and the FDR corrected probability score. The protein complexes with complete or part-coloured representation showed the total molecules present from the query data set to complete the complex. Arrow = Protein, protein complex name or protein function). Figure created using [www.reactome.com](http://www.reactome.com) pathway analysis.



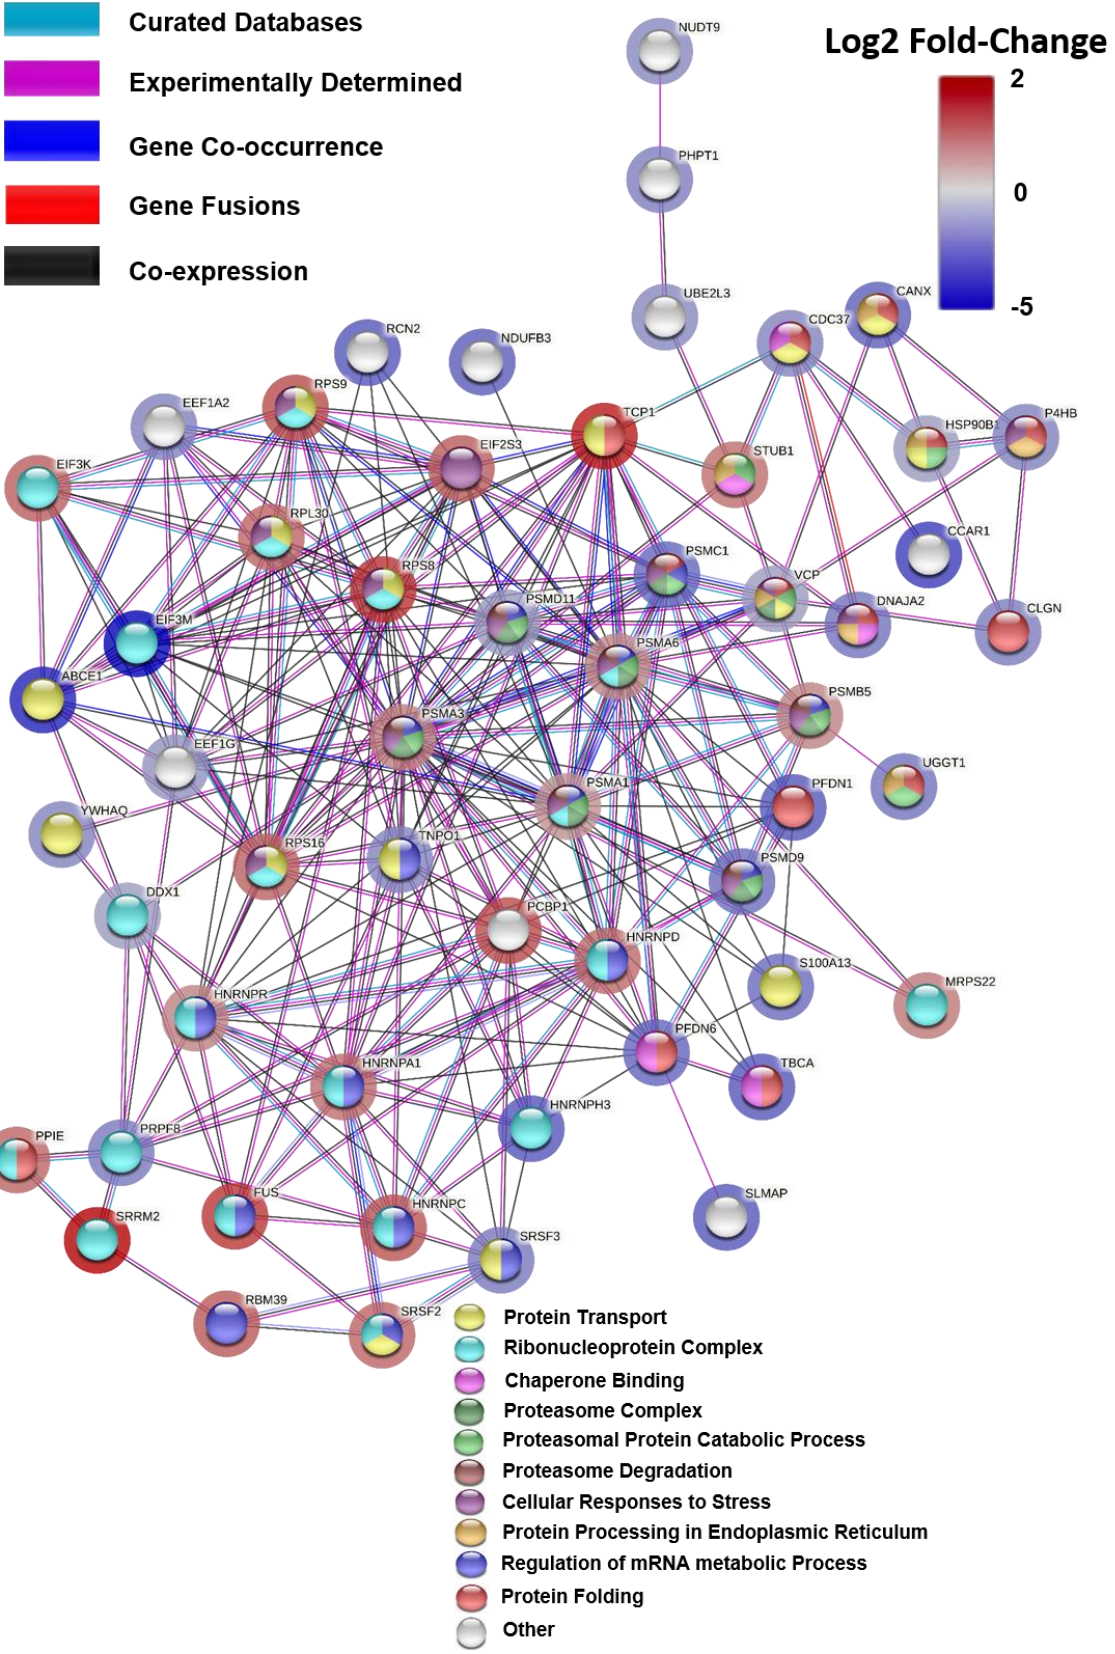

**Figure S9: Association network in STRING. Tissue lysate (TL) Network cluster 3 relating to Figure 1B.** The most significant proteins that were regulated as part of stress induced stimuli are clustered together and Edges based on curated databases, experiments, gene co-occurrences, gene fusions, co-expressions and the nodes are coloured according to their functional enrichments. The halo around the nodes displays the significant log<sub>2</sub> fold-change.

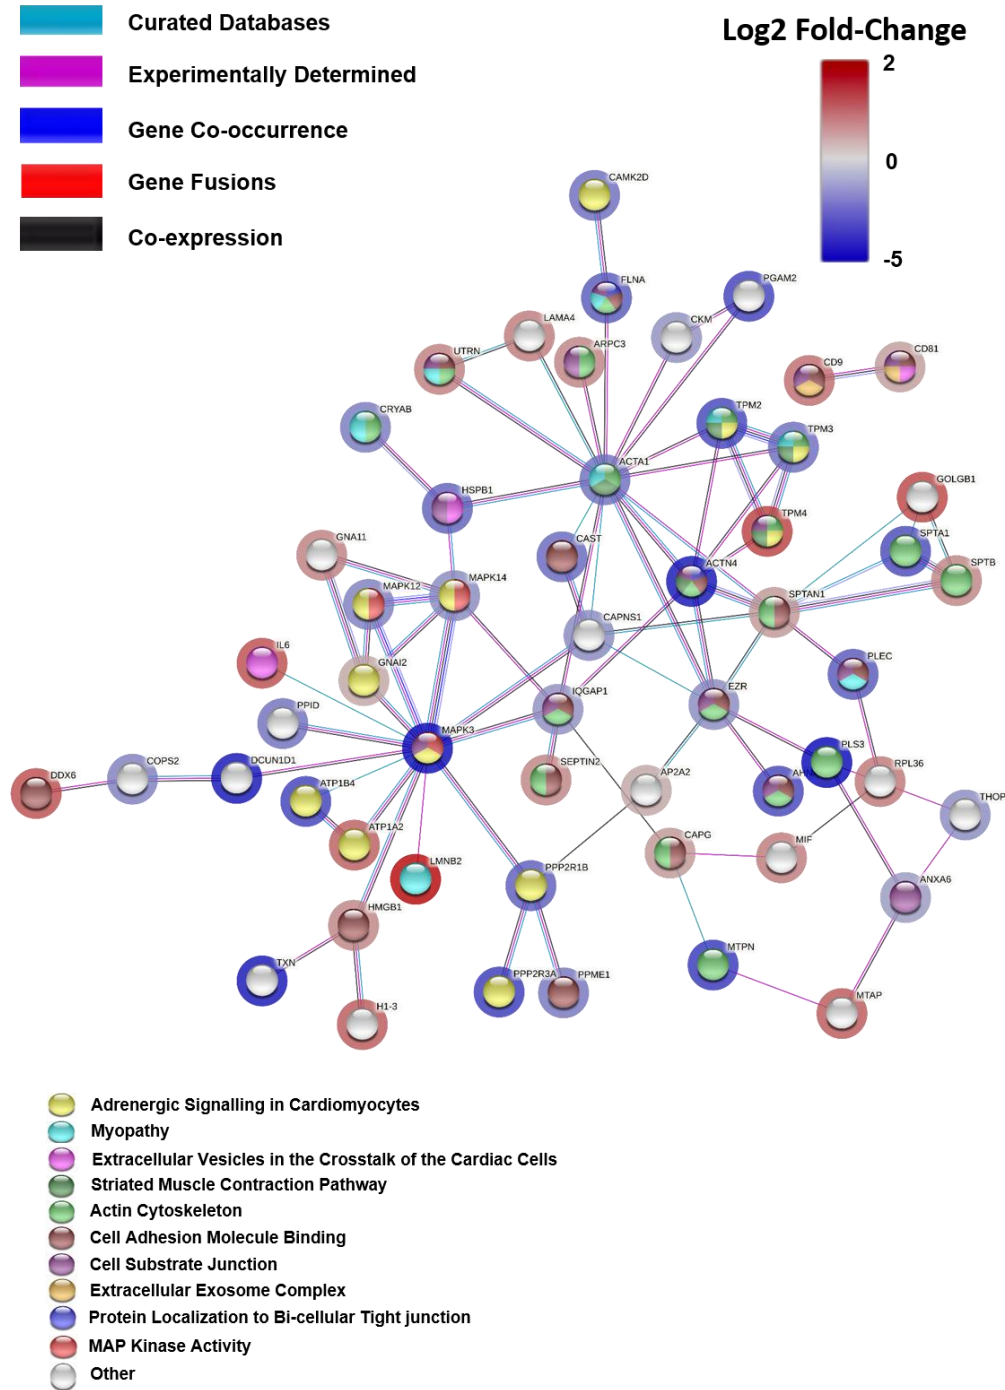

**Figure S10: Association network in STRING. Tissue lysate (TL) Network cluster 1 relating to Figure 1B.** The most significant proteins that represented dysfunctional atrial conduction are clustered together and Edges based on curated databases, experiments, gene co-occurrences, gene fusions, co-expressions and the nodes are coloured according to their functional enrichments. The halo around the nodes displays the significant log2 fold-change.



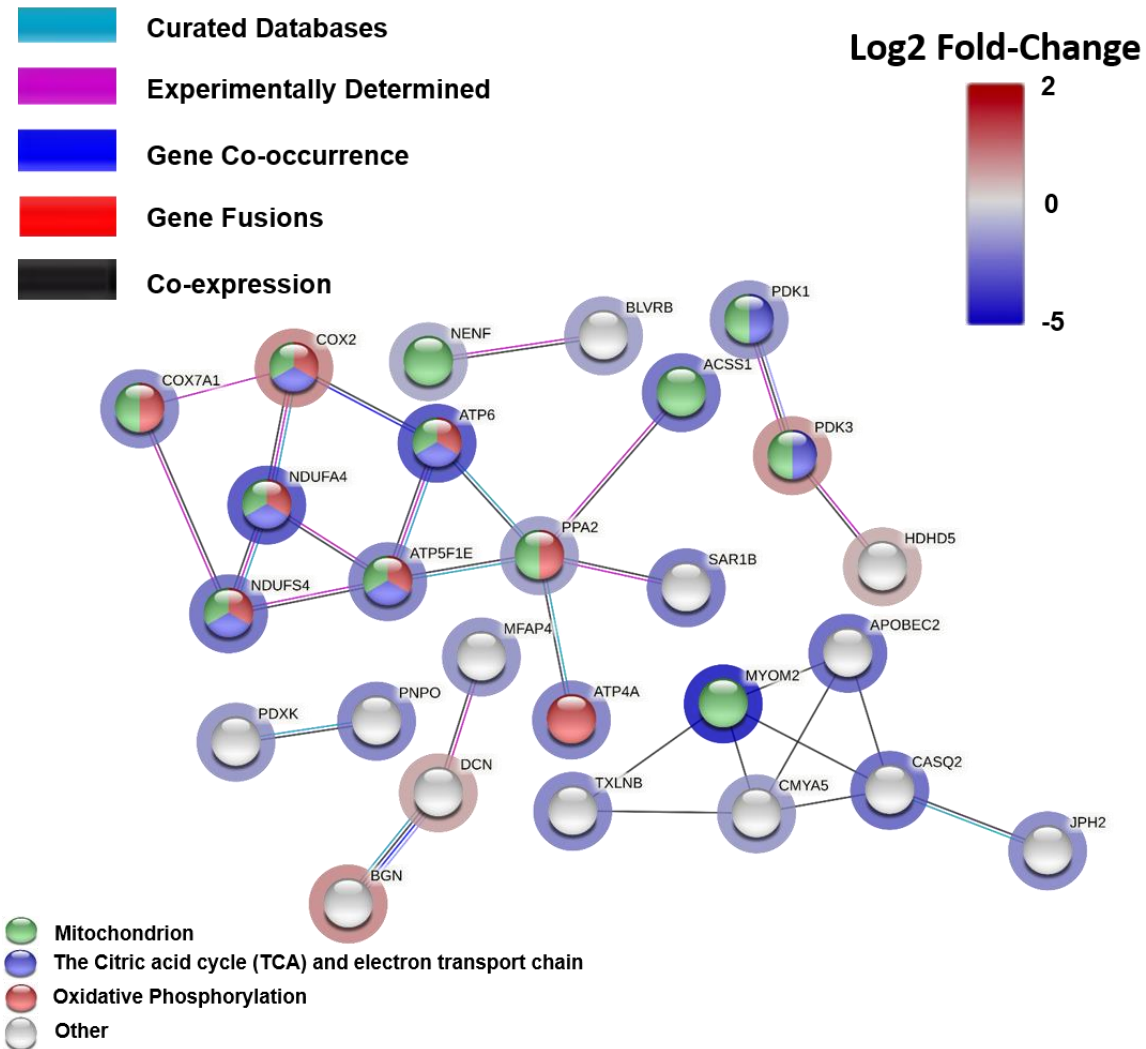

**Figure S11: Association network in STRING. Tissue lysate (TL) Network Cluster 4 relating to Figure 1B.** The most significant proteins that belong to the metabolism of mitochondria are clustered together and Edges based on curated databases, experiments, gene co-occurrences, gene fusions, co-expressions and the nodes are coloured according to their functional enrichments. The halo around the nodes displays the significant log2 fold-change.

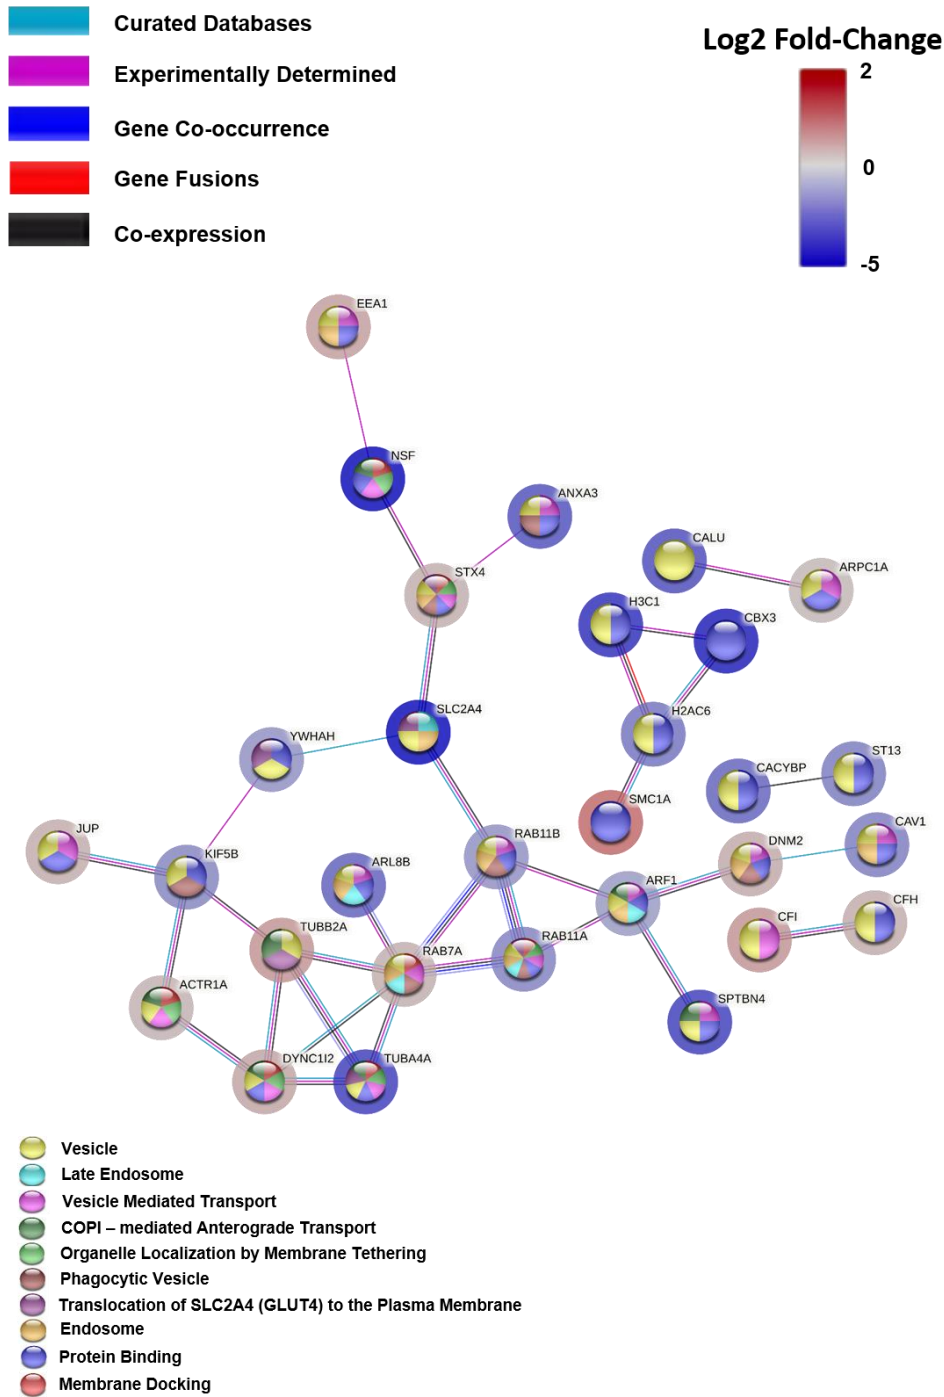

**Figure S12: Association network in STRING. Tissue lysate (TL) Network Cluster 6 relating to Figure 1B.** The most significant proteins that have a functional role of trafficking and transport are clustered together and the Edges based on curated databases, experiments, gene co-occurrences, gene fusions, co-expressions and the nodes are coloured according to their functional enrichments. The halo around the nodes displays the significant log2 fold-change.

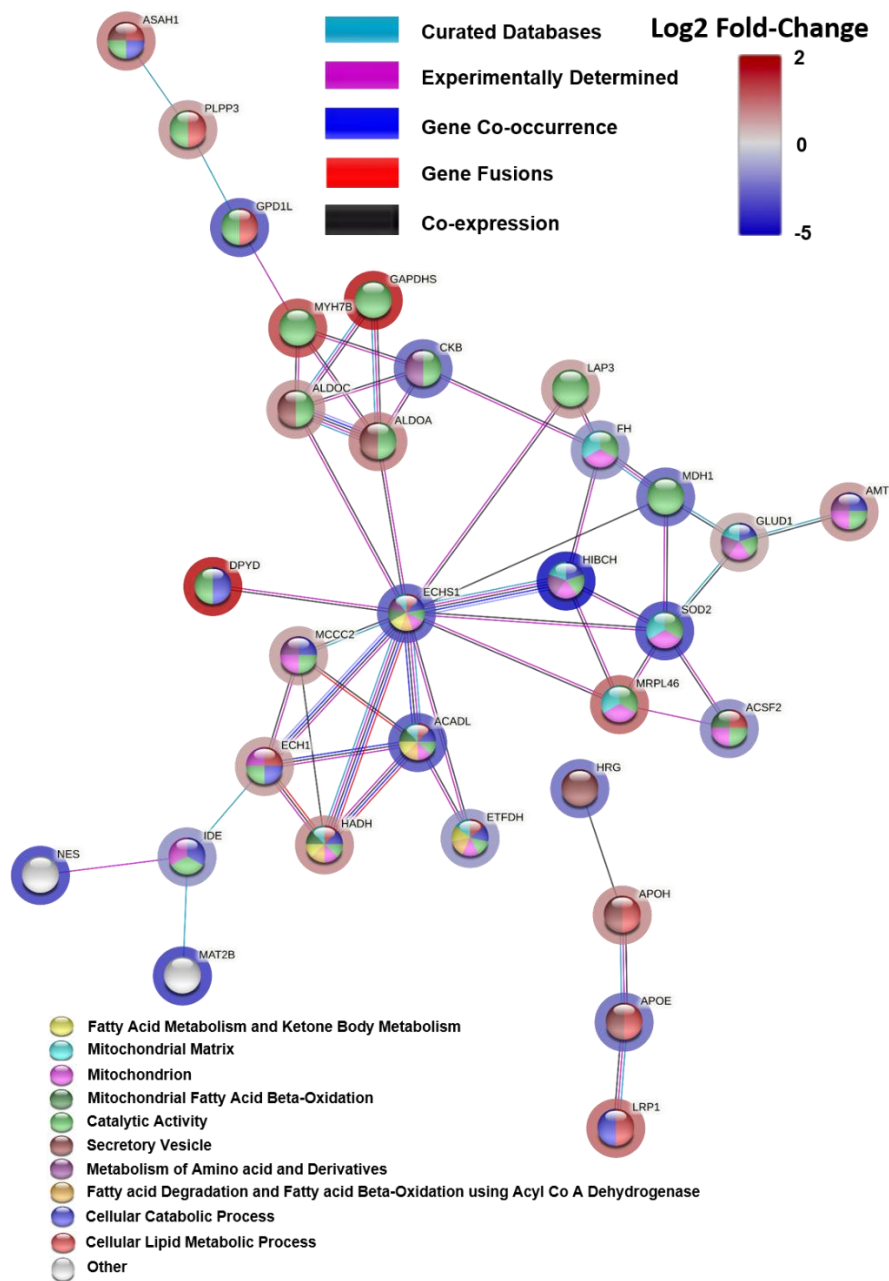

**Figure S13: Association network in STRING. Tissue lysate (TL) Network cluster 2 relating to Figure 1B.** The most significant proteins that represented cellular metabolisms are clustered together and Edges based on curated databases, experiments, gene co-occurrences, gene fusions, co-expressions and the nodes are coloured according to their functional enrichments. The halo around the nodes displays the significant log2 fold-change.

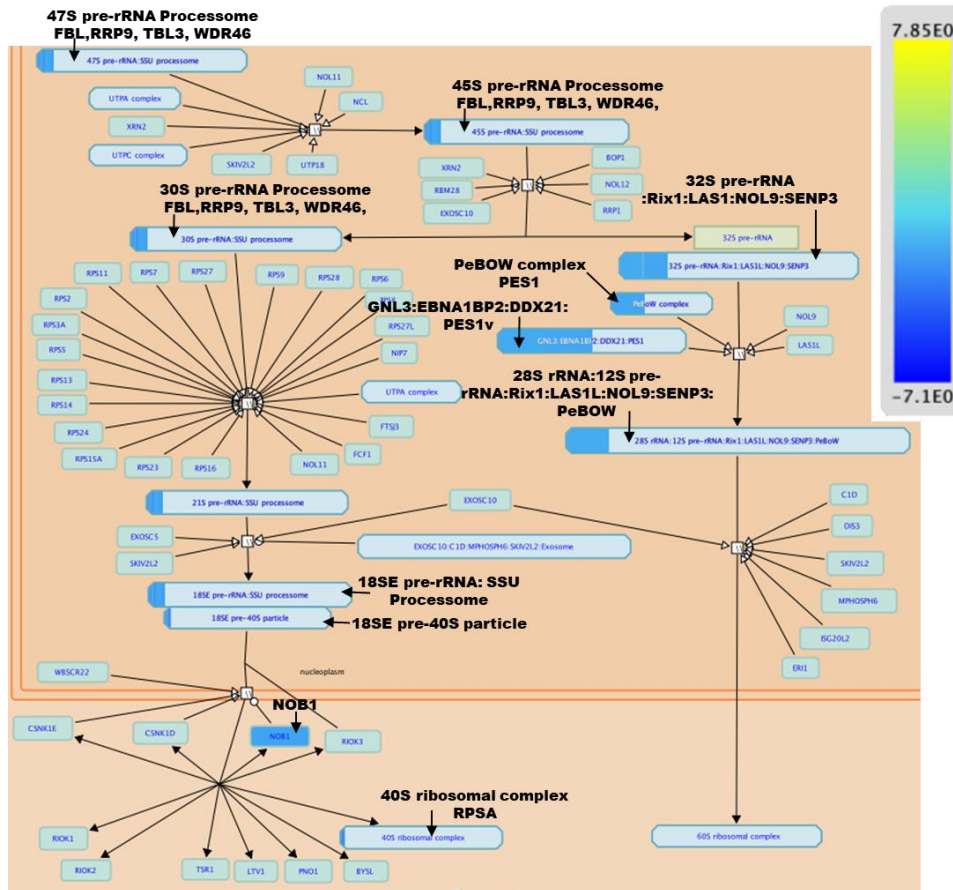

**Figure S14: Transcriptomics analysis relating to Figure 1B.** Transcriptomics analysis showing the Down regulation of the rRNA processing pathway in the nucleolus and cytosol of AF goat model. (Arrow = Gene name, protein complex name or protein function. Yellow = up regulation (log2 fold-change) and Blue= down regulation (log2 fold-change)). Pathway analysed using Reactome database.

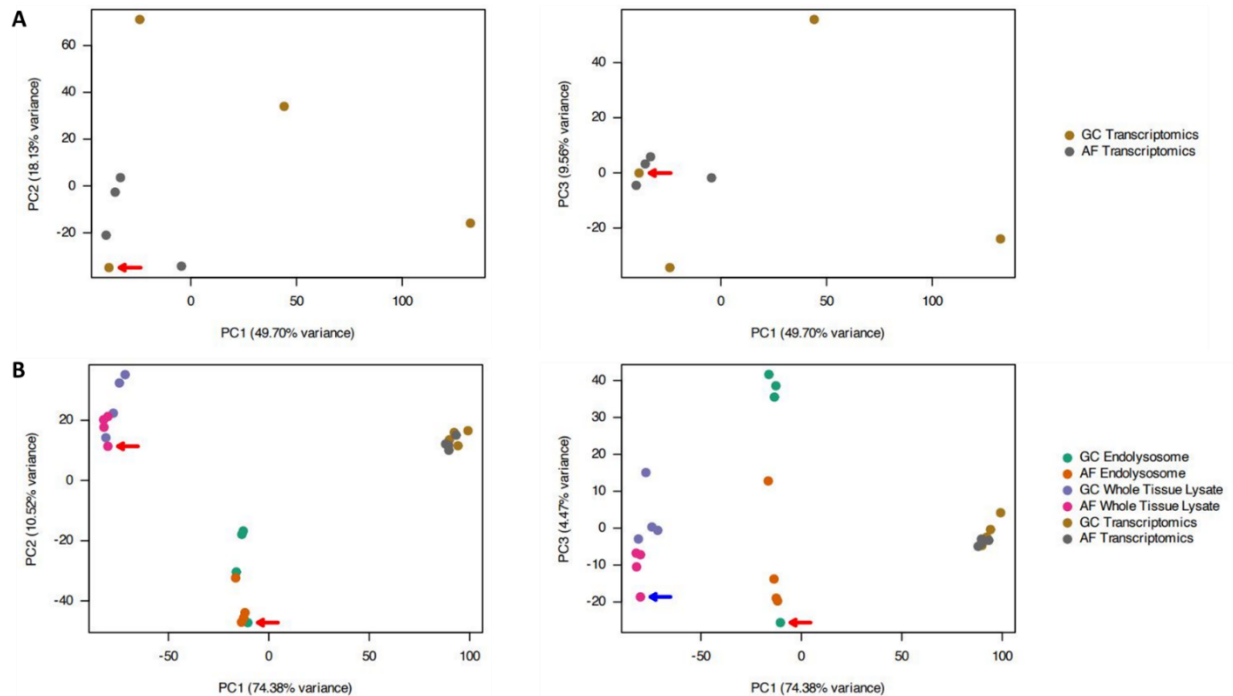

**Figure S15: Biological replicate outlier analysis of transcriptomics-only and combined transcriptomics and proteomics data relating to STAR methods, removal of sample outliers.**

**A.** Principal Components Analysis plot for the transcriptomics-only data. Left panel - Principal Component (PC) 1 vs PC2. Right panel - PC1 vs PC3. Sample 38658 (indicated by red arrow), nominally a Goat Control (GC)/sham model sample, was observed to cluster with the Atrial Fibrillation (AF) samples. Further investigation suggested the possibility of sample contamination, so this sample was removed from the analysis.

**B.** Principal Components Analysis plots for Whole Tissue Lysate and Endolysosome fraction sample proteomic data as well as the transcriptomic data after cross-modality integration. Left panel - Principal Component (PC) 1 vs PC2. Right panel - PC1 vs PC3. For consistency with the transcriptomics data processing, we applied similar strict criteria to outlier consideration in the proteomics dataset. Over all principal components, we identified endolysosome fraction GC sample 47220 (indicated by red arrow) and whole tissue lysate AF sample 45158 (indicated by blue arrow) as potential outliers, so we removed these samples from the analysis as well.

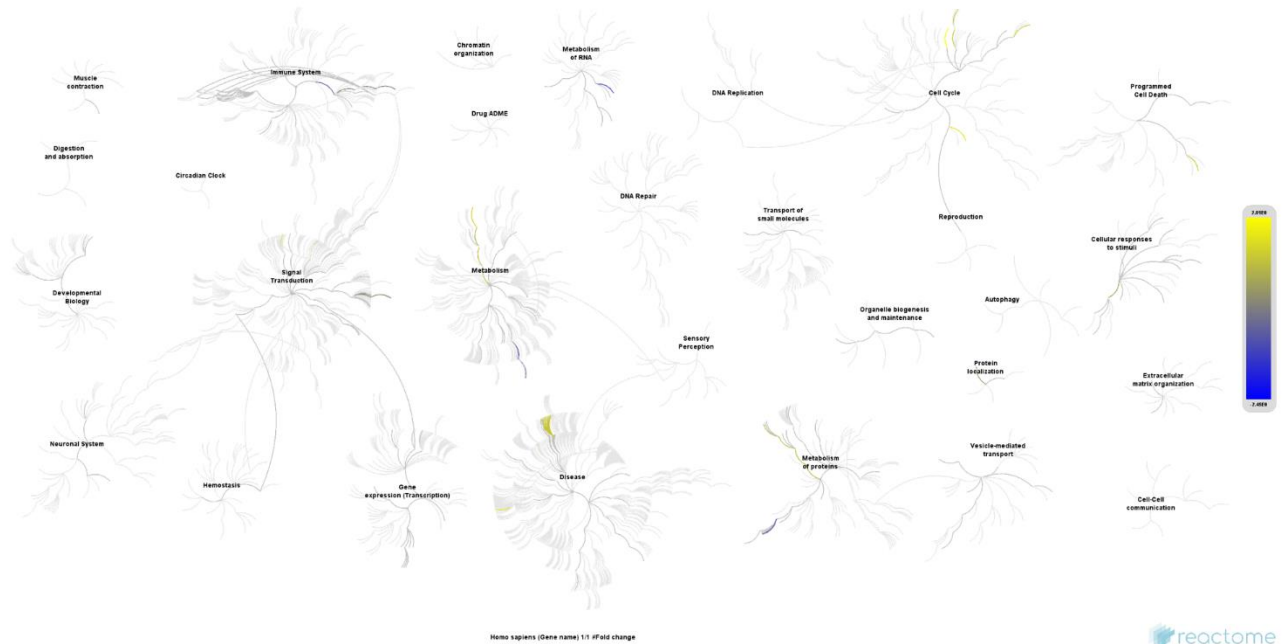

**Figure S16: EL most significant proteins displayed in a Reactome genome-wide, hierarchical visualization of pathways in a space filling graph relating to Figure 1A. Highest up and down regulated pathways are depicted in yellow and blue.**

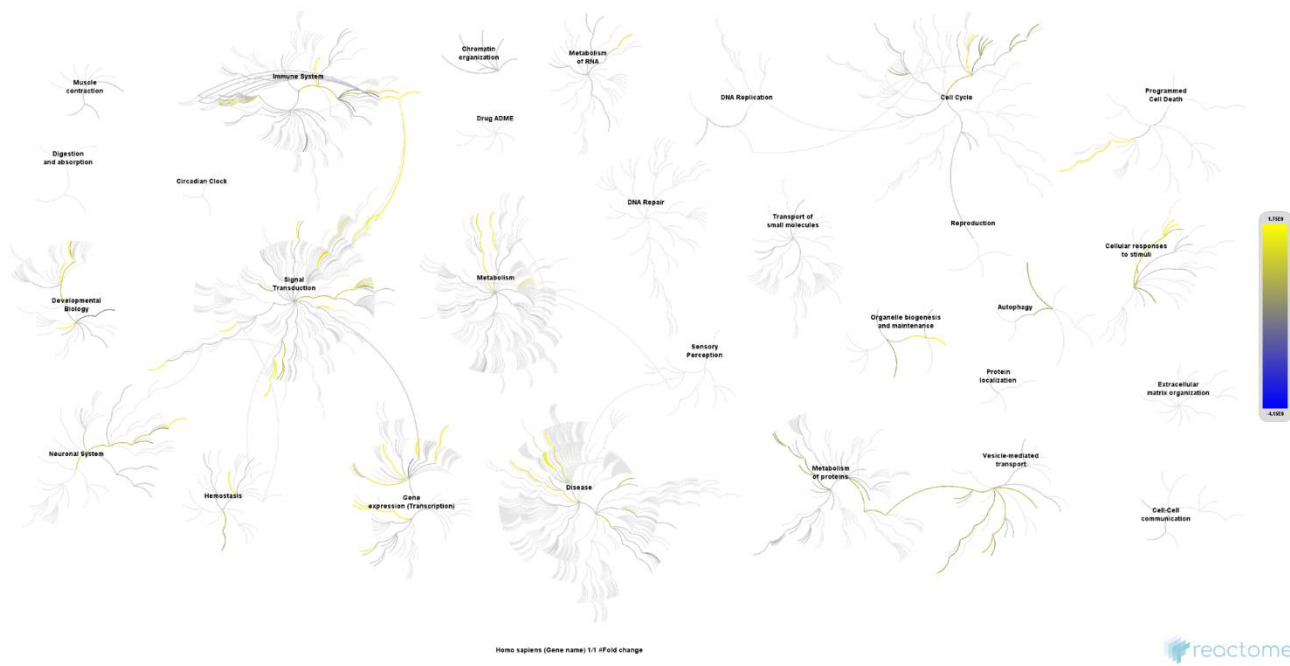

**Figure S17: TL most significant proteins displayed in a Reactome genome-wide, hierarchical visualization of pathways in a space filling graph relating to Figure 1B. Highest up and down regulated pathways are depicted in yellow and blue.**

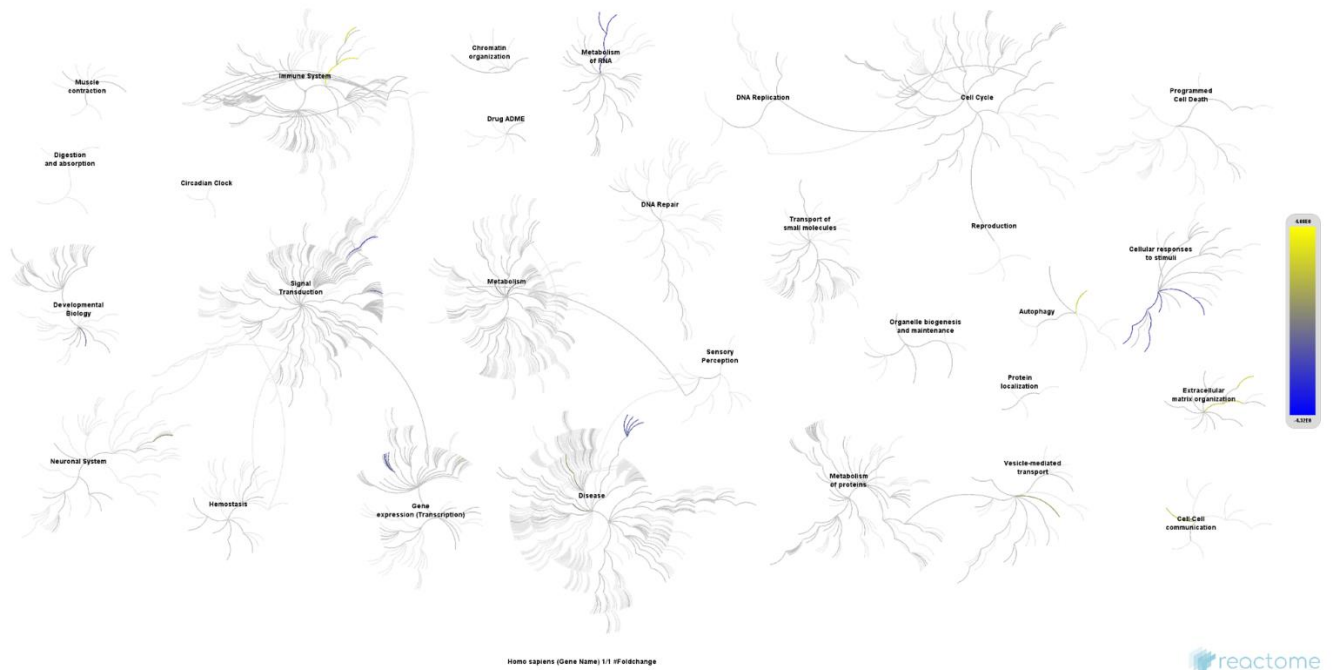

**Figure S18: Transcriptomics outcome for the most significant genes displayed in a Reactome genome-wide, hierarchical visualization of pathways in a space filling graph relating to STAR methods qualification and quantification of mRNA. Highest up and down regulated pathways are depicted in yellow and blue.**



### Supplemental Tables

| Pathway Name                                                                                                        | Stable Identifier |
|---------------------------------------------------------------------------------------------------------------------|-------------------|
| Prefoldin mediated transfer of substrate to CCT/TriC                                                                | (R-HSA-389957)    |
| Cooperation of Prefoldin and TriC/CCT in actin and tubulin folding                                                  | (R-HSA-389958)    |
| Respiratory electron transport, ATP synthesis by chemiosmotic coupling, and heat production by uncoupling proteins. | (R-HSA-163200)    |
| Respiratory electron transport                                                                                      | (R-HSA-611105)    |
| Gene and protein expression by JAK-STAT signaling after Interleukin-12 stimulation                                  | (R-HSA-8950505)   |
| Interleukin-12 signaling                                                                                            | (R-HSA-9020591)   |
| The citric acid (TCA) cycle and respiratory electron transport                                                      | (R-HSA-1428517)   |
| Chaperonin-mediated protein folding                                                                                 | (R-HSA-390466)    |
| Interleukin-12 family signaling                                                                                     | (R-HSA-447115)    |
| Protein folding                                                                                                     | (R-HSA-391251)    |
| Complex I biogenesis                                                                                                | (R-HSA-6799198)   |
| Beta oxidation of octanoyl-CoA to hexanoyl-CoA                                                                      | (R-HSA-77348)     |
| Beta oxidation of lauroyl-CoA to decanoyl-CoA-CoA                                                                   | (R-HSA-77310)     |
| Beta oxidation of hexanoyl-CoA to butanoyl-CoA                                                                      | (R-HSA-77350)     |
| Mitochondrial protein import                                                                                        | (R-HSA-1268020)   |
| Beta oxidation of decanoyl-CoA to octanoyl-CoA-CoA                                                                  | (R-HSA-77346)     |
| Depolymerisation of the Nuclear Lamina                                                                              | (R-HSA-4419969)   |
| RHOBTB2 GTPase cycle                                                                                                | (R-HSA-9013418)   |
| Initiation of Nuclear Envelope (NE) Reformation                                                                     | (R-HSA-2995383)   |
| Protein localization                                                                                                | (R-HSA-9609507)   |
| RHOBTB GTPase Cycle                                                                                                 | (R-HSA-9706574)   |
| Breakdown of the nuclear lamina                                                                                     | (R-HSA-352238)    |
| Drug resistance in ERBB2 KD mutants                                                                                 | (R-HSA-9665230)   |
| Drug-mediated inhibition of ERBB2 signaling                                                                         | (R-HSA-9652282)   |
| Resistance of ERBB2 KD mutants to AEE788                                                                            | (R-HSA-9665250)   |

**Table S2.2: The list of most significantly regulated Reactome pathways identified from the EL proteomics entity input relating to Figure 1A.**

| <b>Pathway Name</b>                                                                | <b>Stable Identifier</b> |
|------------------------------------------------------------------------------------|--------------------------|
| Interleukin-12 family signaling                                                    | (R-HSA-447115)           |
| COPI-mediated anterograde transport                                                | (R-HSA-6807878)          |
| L1CAM interactions                                                                 | (R-HSA-373760)           |
| Interleukin-12 signaling                                                           | (R-HSA-9020591)          |
| Senescence-Associated Secretory Phenotype (SASP)                                   | (R-HSA-2559582)          |
| Post NMDA receptor activation events                                               | (R-HSA-438064)           |
| Microtubule-dependent trafficking of connexons from Golgi to the plasma membrane   | (R-HSA-190840)           |
| Recycling pathway of L1                                                            | (R-HSA-437239)           |
| Transport of connexons to the plasma membrane                                      | (R-HSA-190872)           |
| Signaling by Interleukins                                                          | (R-HSA-449147)           |
| ER to Golgi Anterograde Transport                                                  | (R-HSA-199977)           |
| Post-chaperonin tubulin folding pathway                                            | (R-HSA-389977)           |
| Activation of NMDA receptors and postsynaptic events                               | (R-HSA-442755)           |
| Signaling by MAP2K mutants                                                         | (R-HSA-9652169)          |
| Signaling by ALK fusions and activated point mutants                               | (R-HSA-9725370)          |
| Signaling by ALK in cancer                                                         | (R-HSA-9700206)          |
| RAF-independent MAPK1/3 activation                                                 | (R-HSA-112409)           |
| Prefoldin mediated transfer of substrate to CCT/TriC                               | (R-HSA-389957)           |
| Formation of tubulin folding intermediates by CCT/TriC                             | (R-HSA-389960)           |
| Gene and protein expression by JAK-STAT signaling after Interleukin-12 stimulation | (R-HSA-8950505)          |
| Negative feedback regulation of MAPK pathway                                       | (R-HSA-5674499)          |
| Cellular Senescence                                                                | (R-HSA-2559583)          |
| Activation of AMPK downstream of NMDARs                                            | (R-HSA-9619483)          |
| Formation of the cornified envelope                                                | (R-HSA-6809371)          |
| RHO GTPases activate IQGAPs                                                        | (R-HSA-5626467)          |

**Table S2.3: The list of most significantly regulated Reactome pathways identified from the TL proteomics entity input relating to Figure 1B.**

| Pathway Name                                                      | Stable Identifier |
|-------------------------------------------------------------------|-------------------|
| rRNA processing in the nucleus and cytosol                        | (R-HSA-8868773)   |
| Major pathway of rRNA processing in the nucleolus and cytosol     | (R-HSA-6791226)   |
| rRNA processing                                                   | (R-HSA-72312)     |
| Interferon Signaling                                              | (R-HSA-913531)    |
| Transcriptional regulation of white adipocyte differentiation     | (R-HSA-381340)    |
| PERK regulates gene expression                                    | (R-HSA-381042)    |
| Loss of MECP2 binding ability to 5hmC-DNA                         | (R-HSA-9022534)   |
| Response of EIF2AK1 (HRI) to heme deficiency                      | (R-HSA-9648895)   |
| Response of EIF2AK4 (GCN2) to amino acid deficiency               | (R-HSA-9633012)   |
| Translocation of SLC2A4 (GLUT4) to the plasma membrane            | (R-HSA-1445148)   |
| ATF4 activates genes in response to endoplasmic reticulum stress  | (R-HSA-380994)    |
| Assembly of collagen fibrils and other multimeric structures      | (R-HSA-2022090)   |
| Cellular response to starvation                                   | (R-HSA-9711097)   |
| Regulation of MECP2 expression and activity                       | (R-HSA-9022692)   |
| NGF-stimulated transcription                                      | (R-HSA-9031628)   |
| Loss of MECP2 binding ability to 5mC-DNA                          | (R-HSA-9022538)   |
| Collagen chain trimerization                                      | (R-HSA-8948216)   |
| ATF6 (ATF6-alpha) activates chaperone genes                       | (R-HSA-381183)    |
| MECP2 regulates transcription of genes involved in GABA signaling | (R-HSA-9022927)   |
| Reversible hydration of carbon dioxide                            | (R-HSA-1475029)   |
| ATF6 (ATF6-alpha) activates chaperones                            | (R-HSA-381033)    |
| Unfolded Protein Response (UPR)                                   | (R-HSA-381119)    |
| Interferon gamma signaling                                        | (R-HSA-877300)    |

**Table S2.4: The list of most significantly regulated Reactome pathways identified from the transcriptomics analysis relating to STAR methods, qualification and quantification of mRNA.**

**Supplemental Table Legends:**

**Table S1.1:** The complete list of the most significantly regulated genes of the LA of the AF goat model obtained from Transcriptomics analysis **related to STAR methods**, qualification and quantification of mRNA.

**Table S1.2:** The complete list of the most significantly regulated proteins of the TL fraction from Proteomics analysis, **related to Figure 1B**.

**Table S2.1:** Integrated Analysis of Proteomics and Transcriptomics **related to STAR methods**. The complete list of pathways obtained from integrated omics analysis of EL, TL proteomics and transcriptomics.

**Table S3.1:** The complete list of the most significantly regulated proteins identified uniquely in EL fraction **related to Figure 1A**.
